# Supplementary material
Source: Royal Society of Chemistry journal article supplement (doi:10.1039/d6ay00457a)
Supplement: d6ay00457a1.pdf [file d6ay00457a1.pdf]

## Supplementary information

### Unraveling the Alteration of Chemical Compositions in Cordyceps and Its Host Larvae Using Mass Spectrometry Imaging

Shipeng Sun<sup>1,†</sup>, Yuchen Zou<sup>1,†</sup>, Weiwei Tang<sup>1,\*</sup>, Zhengming Qian<sup>2,\*</sup>, Bin Li<sup>1,\*</sup>

<sup>1</sup> State Key Laboratory of Natural Medicines and School of Traditional Chinese Pharmacy, China Pharmaceutical University, Nanjing, 210009, China

<sup>2</sup> Key Laboratory of State Administration of Traditional Chinese Medicine, Dongguan HEC Cordyceps R&D Co., Ltd., Dongguan, Guangdong 523850, China

\* Corresponding authors:

E-mail: [weiweitang@cpu.edu.cn](mailto:weiweitang@cpu.edu.cn) (Weiwei Tang), [qianzhengming1982@126.com](mailto:qianzhengming1982@126.com)  
(Zhengming Qian), [binli@cpu.edu.cn](mailto:binli@cpu.edu.cn) (Bin Li)

† Equally contributing authors.

## Supplementary Figure

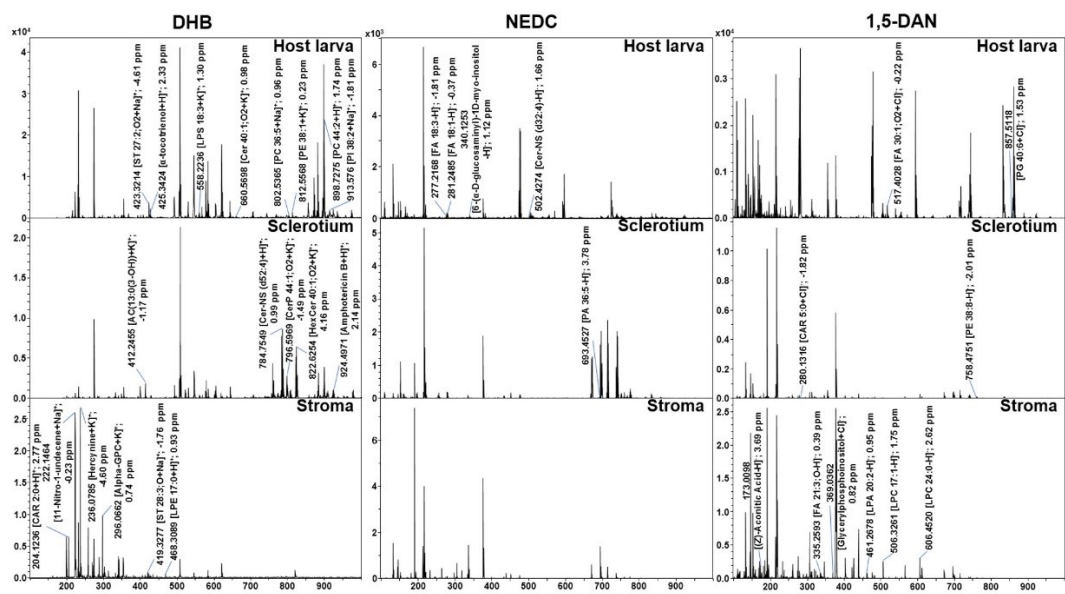

Figure S1. Single-pixel mass spectra with a different matrix. Multiple matrices were used in dual-mode MALDI-MSI to test lipids and other small metabolites. The DHB matrix was used in the positive mode, while NEDC and 1,5-DAN matrices were used in the negative mode.

## Supplementary Table

**Table S1. Compounds putatively identified based on high-resolution MS and MS/MS data.**

| Main class                        | Subclass                                              | Calculated<br>m/z | Measured<br>m/z | Error<br>(ppm) | Ion form | Abbr.      | Formula                                           |
|-----------------------------------|-------------------------------------------------------|-------------------|-----------------|----------------|----------|------------|---------------------------------------------------|
| Fatty Acids and Conjugates [FA01] | Unsaturated fatty acids [FA0103]                      | 277.22            | 277.22          | -1.81          | [M-H]-   | FA 18:3    | C <sub>18</sub> H <sub>30</sub> O <sub>2</sub>    |
| Fatty Acids and Conjugates [FA01] | Unsaturated fatty acids [FA0103]                      | 281.25            | 281.25          | -0.37          | [M-H]-   | FA 18:1    | C <sub>18</sub> H <sub>34</sub> O <sub>2</sub>    |
| Fatty Acids and Conjugates [FA01] | Hydroxy fatty acids [FA0105]                          | 185.12            | 185.12          | 3.68           | [M-H]-   | FA 10:1;O  | C <sub>10</sub> H <sub>18</sub> O <sub>3</sub>    |
| Fatty Acids and Conjugates [FA01] | Heterocyclic fatty acids [FA0115]                     | 335.26            | 335.26          | 0.39           | [M-H]-   | FA 21:3;O  | C <sub>21</sub> H <sub>36</sub> O <sub>3</sub>    |
| Fatty Acids and Conjugates [FA01] | Dicarboxylic acids [FA0117]                           | 517.40            | 517.40          | -0.22          | [M+Cl]-  | FA 30:1;O2 | C <sub>30</sub> H <sub>58</sub> O <sub>4</sub>    |
| Eicosanoids [FA03]                | Prostaglandins [FA0301]                               | 379.25            | 379.25          | 0.27           | [M-H]-   | FA 22:4;O3 | C <sub>22</sub> H <sub>36</sub> O <sub>5</sub>    |
| Eicosanoids [FA03]                | Hydroxy/hydroperoxyeicosatetraenoic acids<br>[FA0306] | 319.23            | 319.23          | -1.78          | [M-H]-   | FA 20:4;O  | C <sub>20</sub> H <sub>32</sub> O <sub>3</sub>    |
| Fatty esters [FA07]               | -                                                     | 162.11            | 1162.11         | 2.46           | [M+H]+   | Carnitine  | C <sub>7</sub> H <sub>15</sub> NO <sub>3</sub>    |
| Fatty esters [FA07]               | Fatty acyl carnitines [FA0707]                        | 280.13            | 280.13          | -1.82          | [M+Cl]-  | CAR 5:0    | C <sub>12</sub> H <sub>23</sub> NO <sub>4</sub>   |
| Fatty esters [FA07]               | Fatty acyl carnitines [FA0707]                        | 204.12            | 204.12          | 2.77           | [M+H]+   | CAR 2:0    | C <sub>9</sub> H <sub>17</sub> NO <sub>4</sub>    |
| Fatty esters [FA07]               | Fatty acyl carnitines [FA0707]                        | 254.14            | 254.14          | 1.66           | [M+Na]+  | CAR 4:0    | C <sub>11</sub> H <sub>21</sub> NO <sub>4</sub>   |
| Fatty esters [FA07]               | Fatty acyl carnitines [FA0707]                        | 238.10            | 238.11          | 0.93           | [M+Na]+  | CAR 3:1    | C <sub>10</sub> H <sub>17</sub> NO <sub>4</sub>   |
| Fatty amides [FA08]               | N-acyl amines [FA0802]                                | 328.29            | 328.29          | 0.86           | [M-H]-   | NA 19:0;O2 | C <sub>19</sub> H <sub>39</sub> NO <sub>3</sub>   |
| Monoradylglycerols [GL01]         | Monoacylglycerols [GL0101]                            | 375.25            | 375.25          | 0.31           | [M-H]-   | MG 20:5    | C <sub>23</sub> H <sub>36</sub> O <sub>4</sub>    |
| Triradylglycerols [GL03]          | Triacylglycerols [GL0301]                             | 835.68            | 835.68          | -2.41          | [M-H]-   | TG 51:6    | C <sub>54</sub> H <sub>92</sub> O <sub>6</sub>    |
| Triradylglycerols [GL03]          | Triacylglycerols [GL0301]                             | 871.68            | 871.68          | 2.86           | [M+Na]+  | TG 52:7    | C <sub>55</sub> H <sub>92</sub> O <sub>6</sub>    |
| Triradylglycerols [GL03]          | Triacylglycerols [GL0301]                             | 879.68            | 879.68          | -0.40          | [M+K]+   | TG 51:4    | C <sub>54</sub> H <sub>96</sub> O <sub>6</sub>    |
| Triradylglycerols [GL03]          | Triacylglycerols [GL0301]                             | 895.81            | 895.81          | -3.90          | [M+Na]+  | TG 54:2    | C <sub>57</sub> H <sub>108</sub> O <sub>5</sub>   |
| Triradylglycerols [GL03]          | Triacylglycerols [GL0301]                             | 921.79            | 921.79          | -1.91          | [M+Na]+  | TG 55:3    | C <sub>58</sub> H <sub>106</sub> O <sub>6</sub>   |
| Glycerophosphocholines [GP01]     | -                                                     | 296.07            | 296.07          | 0.74           | [M+K]+   | GPC        | C <sub>8</sub> H <sub>20</sub> NO <sub>6</sub> P  |
| Glycerophosphocholines [GP01]     | Diacylglycerophosphocholines [GP0101]                 | 798.54            | 798.54          | -1.46          | [M+K]+   | PC 34:1    | C <sub>42</sub> H <sub>82</sub> NO <sub>8</sub> P |

|                                    |                                                           |        |        |       |         |           |                                                    |
|------------------------------------|-----------------------------------------------------------|--------|--------|-------|---------|-----------|----------------------------------------------------|
| Glycerophosphocholines [GP01]      | Diacylglycerophosphocholines [GP0101]                     | 802.54 | 802.54 | 0.96  | [M+Na]+ | PC 36:5   | C <sub>44</sub> H <sub>78</sub> NO <sub>8</sub> P  |
| Glycerophosphocholines [GP01]      | Diacylglycerophosphocholines [GP0101]                     | 820.62 | 820.62 | 1.27  | [M+Na]+ | PC O-38:3 | C <sub>46</sub> H <sub>88</sub> NO <sub>7</sub> P  |
| Glycerophosphocholines [GP01]      | Diacylglycerophosphocholines [GP0101]                     | 898.73 | 898.73 | 1.74  | [M+H]+  | PC 44:2   | C <sub>52</sub> H <sub>100</sub> NO <sub>8</sub> P |
| Glycerophosphocholines [GP01]      | 1-alkyl,2-acylglycerophosphocholines [GP0102]             | 556.32 | 556.32 | -4.03 | [M+Cl]- | PC O-18:1 | C <sub>26</sub> H <sub>52</sub> NO <sub>7</sub> P  |
| Glycerophosphocholines [GP01]      | Monoacylglycerophosphocholines [GP0105]                   | 506.33 | 506.33 | 1.75  | [M-H]-  | LPC 17:1  | C <sub>25</sub> H <sub>50</sub> NO <sub>7</sub> P  |
| Glycerophosphocholines [GP01]      | Monoacylglycerophosphocholines [GP0105]                   | 556.28 | 556.28 | 1.98  | [M+K]+  | LPC 18:3  | C <sub>26</sub> H <sub>48</sub> NO <sub>7</sub> P  |
| Glycerophosphocholines [GP01]      | Monoacylglycerophosphocholines [GP0105]                   | 606.45 | 606.45 | 2.62  | [M-H]-  | LPC 24:0  | C <sub>32</sub> H <sub>66</sub> NO <sub>7</sub> P  |
| Glycerophosphoethanolamines [GP02] | Diacylglycerophosphoethanolamines [GP0201]                | 714.51 | 714.51 | 1.08  | [M-H]-  | PE 34:2   | C <sub>39</sub> H <sub>74</sub> NO <sub>8</sub> P  |
| Glycerophosphoethanolamines [GP02] | Diacylglycerophosphoethanolamines [GP0201]                | 716.52 | 716.52 | 0.17  | [M-H]-  | PE 34:1   | C <sub>39</sub> H <sub>76</sub> NO <sub>8</sub> P  |
| Glycerophosphoethanolamines [GP02] | Diacylglycerophosphoethanolamines [GP0201]                | 758.48 | 758.48 | -2.01 | [M-H]-  | PE 38:8   | C <sub>43</sub> H <sub>70</sub> NO <sub>8</sub> P  |
| Glycerophosphoethanolamines [GP02] | Diacylglycerophosphoethanolamines [GP0201]                | 812.56 | 812.56 | 0.23  | [M+K]+  | PE 38:1   | C <sub>43</sub> H <sub>84</sub> NO <sub>8</sub> P  |
| Glycerophosphoethanolamines [GP02] | 1-alkyl,2-acylglycerophosphoethanolamines [GP0202]        | 724.53 | 724.53 | -1.05 | [M-H]-  | PE O-36:4 | C <sub>41</sub> H <sub>76</sub> NO <sub>7</sub> P  |
| Glycerophosphoethanolamines [GP02] | 1-alkyl,2-acylglycerophosphoethanolamines [GP0202]        | 726.54 | 726.54 | -1.40 | [M-H]-  | PE O-36:3 | C <sub>41</sub> H <sub>78</sub> NO <sub>7</sub> P  |
| Glycerophosphoethanolamines [GP02] | 1-alkyl,2-acylglycerophosphoethanolamines [GP0202]        | 728.56 | 728.56 | 2.38  | [M-H]-  | PE O-36:2 | C <sub>41</sub> H <sub>80</sub> NO <sub>7</sub> P  |
| Glycerophosphoethanolamines [GP02] | 1-(1Z-alkenyl),2-acylglycerophosphoethanolamines [GP0203] | 738.52 | 738.52 | 1.50  | [M+Cl]- | PE O-34:1 | C <sub>39</sub> H <sub>78</sub> NO <sub>7</sub> P  |
| Glycerophosphoethanolamines [GP02] | Monoacylglycerophosphoethanolamines [GP0205]              | 452.28 | 452.28 | -3.45 | [M-H]-  | LPE 16:0  | C <sub>21</sub> H <sub>44</sub> NO <sub>7</sub> P  |
| Glycerophosphoethanolamines        | Monoacylglycerophosphoethanolamines                       | 468.31 | 468.31 | 0.93  | [M+H]+  | LPE 17:0  | C <sub>22</sub> H <sub>46</sub> NO <sub>7</sub> P  |

|                                    |                                              |        |        |       |         |          |                                                    |  |
|------------------------------------|----------------------------------------------|--------|--------|-------|---------|----------|----------------------------------------------------|--|
| [GP02]                             | [GP0205]                                     |        |        |       |         |          |                                                    |  |
| Glycerophosphoethanolamines [GP02] | Monoacylglycerophosphoethanolamines [GP0205] | 474.26 | 474.26 | -0.66 | [M-H]-  | LPE 18:3 | C <sub>23</sub> H <sub>42</sub> NO <sub>7</sub> P  |  |
| Glycerophosphoethanolamines [GP02] | Monoacylglycerophosphoethanolamines [GP0205] | 476.28 | 476.28 | 0.50  | [M-H]-  | LPE 18:2 | C <sub>23</sub> H <sub>44</sub> NO <sub>7</sub> P  |  |
| Glycerophosphoethanolamines [GP02] | Monoacylglycerophosphoethanolamines [GP0205] | 478.29 | 478.29 | -1.91 | [M-H]-  | LPE 18:1 | C <sub>23</sub> H <sub>46</sub> NO <sub>7</sub> P  |  |
| Glycerophosphoethanolamines [GP02] | Monoacylglycerophosphoethanolamines [GP0205] | 506.33 | 506.33 | 0.37  | [M-H]-  | LPE 20:1 | C <sub>25</sub> H <sub>50</sub> NO <sub>7</sub> P  |  |
| Glycerophosphoethanolamines [GP02] | Monoacylglycerophosphoethanolamines [GP0205] | 508.34 | 508.34 | 4.60  | [M-H]-  | LPE 20:0 | C <sub>25</sub> H <sub>52</sub> NO <sub>7</sub> P  |  |
| Glycerophosphoserines [GP03]       | Diacylglycerophosphoserines [GP0301]         | 856.55 | 856.54 | -3.90 | [M+K]+  | PS 38:1  | C <sub>44</sub> H <sub>84</sub> NO <sub>10</sub> P |  |
| Glycerophosphoserines [GP03]       | Monoacylglycerophosphoserines [GP0305]       | 558.22 | 558.22 | 1.30  | [M+K]+  | LPS 18:3 | C <sub>24</sub> H <sub>42</sub> NO <sub>9</sub> P  |  |
| Glycerophosphoserines [GP03]       | Monoacylglycerophosphoserines [GP0305]       | 562.25 | 562.26 | 1.82  | [M+K]+  | LPS 18:1 | C <sub>24</sub> H <sub>46</sub> NO <sub>9</sub> P  |  |
| Glycerophosphoglycerols [GP04]     | Diacylglycerophosphoglycerols [GP0401]       | 857.51 | 857.51 | 1.53  | [M+Cl]- | PG 40:6  | C <sub>46</sub> H <sub>79</sub> O <sub>10</sub> P  |  |
| Glycerophosphoinositols [GP06]     | Diacylglycerophosphoinositols [GP0601]       | 835.53 | 835.53 | -0.12 | [M-H]-  | PI 34:1  | C <sub>43</sub> H <sub>81</sub> O <sub>13</sub> P  |  |
| Glycerophosphoinositols [GP06]     | Diacylglycerophosphoinositols [GP0601]       | 859.53 | 859.54 | 1.86  | [M-H]-  | PI 36:3  | C <sub>45</sub> H <sub>81</sub> O <sub>13</sub> P  |  |
| Glycerophosphoinositols [GP06]     | Diacylglycerophosphoinositols [GP0601]       | 861.55 | 861.55 | -1.34 | [M-H]-  | PI 36:2  | C <sub>45</sub> H <sub>83</sub> O <sub>13</sub> P  |  |
| Glycerophosphoinositols [GP06]     | Diacylglycerophosphoinositols [GP0601]       | 863.57 | 863.57 | -0.35 | [M-H]-  | PI 36:1  | C <sub>45</sub> H <sub>85</sub> O <sub>13</sub> P  |  |
| Glycerophosphoinositols [GP06]     | Diacylglycerophosphoinositols [GP0601]       | 911.56 | 911.56 | -0.66 | [M+Na]+ | PI 38:3  | C <sub>47</sub> H <sub>85</sub> O <sub>13</sub> P  |  |
| Glycerophosphoinositols [GP06]     | Diacylglycerophosphoinositols [GP0601]       | 913.58 | 913.58 | -1.81 | [M+Na]+ | PI 38:2  | C <sub>47</sub> H <sub>87</sub> O <sub>13</sub> P  |  |
| Glycerophosphoinositols [GP06]     | Diacylglycerophosphoinositols [GP0601]       | 915.59 | 915.59 | -1.42 | [M+Na]+ | PI 38:1  | C <sub>47</sub> H <sub>89</sub> O <sub>13</sub> P  |  |
| Glycerophosphoinositols [GP06]     | Diacylglycerophosphoinositols [GP0601]       | 921.64 | 921.64 | 0.27  | [M-H]-  | PI 40:0  | C <sub>49</sub> H <sub>95</sub> O <sub>13</sub> P  |  |
| Glycerophosphoinositols [GP06]     | Monoacylglycerophosphoinositols [GP0605]     | 571.29 | 571.29 | 0.90  | [M-H]-  | LPI 16:0 | C <sub>25</sub> H <sub>49</sub> O <sub>12</sub> P  |  |
| Glycerophosphoinositols [GP06]     | Monoacylglycerophosphoinositols [GP0605]     | 593.27 | 593.27 | 1.45  | [M-H]-  | LPI 18:3 | C <sub>27</sub> H <sub>47</sub> O <sub>12</sub> P  |  |
| Glycerophosphoinositols [GP06]     | Monoacylglycerophosphoinositols [GP0605]     | 595.29 | 595.29 | -4.35 | [M-H]-  | LPI 18:2 | C <sub>27</sub> H <sub>49</sub> O <sub>12</sub> P  |  |
| Glycerophosphoinositols [GP06]     | Monoacylglycerophosphoinositols [GP0605]     | 597.30 | 597.31 | 3.29  | [M-H]-  | LPI 18:1 | C <sub>27</sub> H <sub>51</sub> O <sub>12</sub> P  |  |

|                                      |                                                              |         |        |       |         |                |                                                   |
|--------------------------------------|--------------------------------------------------------------|---------|--------|-------|---------|----------------|---------------------------------------------------|
| Glycerophosphates [GP10]             | Diacylglycerophosphates [GP1001]                             | 671.47  | 671.47 | 2.49  | [M-H]-  | PA 34:2        | C <sub>37</sub> H <sub>69</sub> O <sub>8</sub> P  |
| Glycerophosphates [GP10]             | Diacylglycerophosphates [GP1001]                             | 693.45  | 693.45 | 3.78  | [M-H]-  | PA 36:5        | C <sub>39</sub> H <sub>67</sub> O <sub>8</sub> P  |
| Glycerophosphates [GP10]             | Diacylglycerophosphates [GP1001]                             | 6659.46 | 659.46 | 1.51  | [M-H]-  | PA 33:1        | C <sub>36</sub> H <sub>69</sub> O <sub>8</sub> P  |
| Glycerophosphates [GP10]             | Diacylglycerophosphates [GP1001]                             | 699.50  | 699.50 | 2.39  | [M-H]-  | PA 36:2        | C <sub>39</sub> H <sub>73</sub> O <sub>8</sub> P  |
| Glycerophosphates [GP10]             | Monoacylglycerophosphates [GP1005]                           | 461.27  | 461.27 | 0.95  | [M-H]-  | LPA 20:2       | C <sub>23</sub> H <sub>43</sub> O <sub>7</sub> P  |
| Glycerophosphates [GP10]             | Monoacylglycerophosphates [GP1005]                           | 463.28  | 463.28 | 1.05  | [M-H]-  | LPA 20:1       | C <sub>23</sub> H <sub>45</sub> O <sub>7</sub> P  |
| Quinones and hydroquinones<br>[PR02] | Vitamin E [PR0202]                                           | 425.34  | 425.34 | 2.33  | [M+H]+  | Tocotrienol    | C <sub>29</sub> H <sub>44</sub> O <sub>2</sub>    |
| Sphingoid bases [SP01]               | Sphing-4-enines (Sphingosines) [SP0101]                      | 298.28  | 298.27 | -1.18 | [M-H]-  | SPB 18:1;O2    | C <sub>18</sub> H <sub>37</sub> NO <sub>2</sub>   |
| Ceramides [SP02]                     | N-acylsphingosines (ceramides) [SP0201]                      | 502.43  | 502.43 | 1.66  | [M-H]-  | Cer 32:4;O2    | C <sub>32</sub> H <sub>57</sub> NO <sub>3</sub>   |
| Ceramides [SP02]                     | N-acylsphingosines (ceramides) [SP0201]                      | 544.41  | 544.41 | 4.13  | [M+K]+  | Cer 32:3;O2    | C <sub>32</sub> H <sub>59</sub> NO <sub>3</sub>   |
| Ceramides [SP02]                     | N-acylsphingosines (ceramides) [SP0201]                      | 560.50  | 560.50 | 1.40  | [M+Na]+ | Cer 34:1;O2    | C <sub>34</sub> H <sub>67</sub> NO <sub>3</sub>   |
| Ceramides [SP02]                     | N-acylsphingosines (ceramides) [SP0201]                      | 612.48  | 612.48 | 1.87  | [M+K]+  | Cer 37:4;O2    | C <sub>37</sub> H <sub>67</sub> NO <sub>3</sub>   |
| Ceramides [SP02]                     | N-acylsphingosines (ceramides) [SP0201]                      | 660.57  | 660.57 | 0.98  | [M+K]+  | Cer 40:1;O2    | C <sub>40</sub> H <sub>79</sub> NO <sub>3</sub>   |
| Ceramides [SP02]                     | N-acylsphingosines (ceramides) [SP0201]                      | 784.75  | 784.75 | 0.99  | [M+H]+  | Cer 52:4;O2    | C <sub>52</sub> H <sub>97</sub> NO <sub>3</sub>   |
| Ceramides [SP02]                     | N-acylsphinganine<br>(dihydroceramides) [SP0202]             | 522.43  | 522.43 | 0.76  | [M+K]+  | Cer 30:0;O2    | C <sub>30</sub> H <sub>61</sub> NO <sub>3</sub>   |
| Ceramides [SP02]                     | N-acyl-4-<br>hydroxysphinganine (phytoceramides)<br>[SP0203] | 714.58  | 714.58 | 0.31  | [M+Cl]- | Cer 42:2;O4    | C <sub>42</sub> H <sub>81</sub> NO <sub>5</sub>   |
| Ceramides [SP02]                     | N-acyl-4-<br>hydroxysphinganine (phytoceramides)<br>[SP0203] | 738.70  | 738.70 | -0.27 | [M-H]-  | Cer 46:0;O4    | C <sub>46</sub> H <sub>93</sub> NO <sub>5</sub>   |
| Ceramides [SP02]                     | Ceramide 1-phosphates [SP0205]                               | 796.60  | 796.60 | -1.49 | [M+K]+  | CerP 44:1;O2   | C <sub>44</sub> H <sub>88</sub> NO <sub>6</sub> P |
| Neutral glycosphingolipids [SP05]    | Simple Glc series [SP0501]                                   | 822.62  | 822.63 | 4.16  | [M+K]+  | HexCer 40:1;O2 | C <sub>46</sub> H <sub>89</sub> NO <sub>8</sub>   |
| Neutral glycosphingolipids [SP05]    | Simple Glc series [SP0501]                                   | 882.64  | 882.65 | 3.05  | [M+K]+  | HexCer 42:1;O4 | C <sub>48</sub> H <sub>93</sub> NO <sub>10</sub>  |
| Sterols [ST01]                       | Cholesterol and derivatives [ST0101]                         | 423.32  | 423.32 | -4.61 | [M+Na]+ | ST 27:2;O2     | C <sub>27</sub> H <sub>44</sub> O <sub>2</sub>    |

|                 |                                                 |        |        |       |         |                           |                                                               |
|-----------------|-------------------------------------------------|--------|--------|-------|---------|---------------------------|---------------------------------------------------------------|
|                 | Cholesterol and derivatives [ST0101]            | 439.36 | 439.36 | -4.45 | [M-H]-  | ST 30:3;O2                | C <sub>30</sub> H <sub>48</sub> O <sub>2</sub>                |
|                 | Sterol esters [ST0102]                          | 671.58 | 671.58 | -2.17 | [M-H]-  | CE 20:4                   | C <sub>47</sub> H <sub>76</sub> O <sub>2</sub>                |
|                 | Sterol esters [ST0102]                          | 697.59 | 697.59 | 0.57  | [M-H]-  | CE 22:5                   | C <sub>49</sub> H <sub>78</sub> O <sub>2</sub>                |
|                 | Ergosterols and C24-methyl derivatives [ST0103] | 419.33 | 419.33 | -1.76 | [M+Na]+ | ST 28:3;O                 | C <sub>28</sub> H <sub>44</sub> O                             |
| Small molecules | Nucleobase                                      | 134.05 | 134.05 | 4.34  | [M-H]-  | Adenine                   | C <sub>5</sub> H <sub>5</sub> N <sub>5</sub>                  |
| Small molecules | -                                               | 135.03 | 135.03 | 2.71  | [M-H]-  | Hypoxanthine              | C <sub>5</sub> H <sub>4</sub> N <sub>4</sub> O                |
| Small molecules | tricarboxylic acid                              | 173.01 | 173.01 | 3.69  | [M-H]-  | Aconitic Acid             | C <sub>6</sub> H <sub>6</sub> O <sub>6</sub>                  |
| Small molecules | amino acid                                      | 145.06 | 145.06 | -4.5  | [M-H]-  | Glutamine                 | C <sub>5</sub> H <sub>10</sub> N <sub>2</sub> O <sub>3</sub>  |
| Small molecules | sugar alcohol                                   | 181.07 | 181.07 | -0.55 | [M-H]-  | Sorbitol                  | C <sub>6</sub> H <sub>14</sub> O <sub>6</sub>                 |
| Small molecules | nitroalkene                                     | 222.15 | 222.15 | -0.23 | [M+Na]+ | Nitro-undecene            | C <sub>11</sub> H <sub>21</sub> NO <sub>2</sub>               |
| Small molecules | amino-acid betaine                              | 236.08 | 236.08 | -4.60 | [M+K]+  | Hercynine                 | C <sub>9</sub> H <sub>15</sub> N <sub>3</sub> O <sub>2</sub>  |
| Small molecules | ribonucleoside                                  | 268.10 | 268.10 | 1.38  | [M+H]+  | Adenosine                 | C <sub>10</sub> H <sub>13</sub> N <sub>5</sub> O <sub>4</sub> |
| Small molecules | peptide                                         | 328.08 | 328.08 | 2.90  | [M+Cl]- | Glutamyl-Phenylalanine    | C <sub>14</sub> H <sub>17</sub> N <sub>2</sub> O <sub>5</sub> |
| Small molecules | -                                               | 259.12 | 259.12 | -1.54 | [M-H]-  | Glu-leu                   | C <sub>11</sub> H <sub>20</sub> N <sub>2</sub> O <sub>5</sub> |
| Small molecules | nucleoside                                      | 312.13 | 312.13 | 3.06  | [M+H]+  | Dimethylguanosine         | C <sub>12</sub> H <sub>17</sub> N <sub>5</sub> O <sub>5</sub> |
| Small molecules | -                                               | 167.02 | 167.02 | 4.41  | [M-H]-  | Uric Acid                 | C <sub>5</sub> H <sub>4</sub> N <sub>4</sub> O <sub>3</sub>   |
| Small molecules | -                                               | 318.06 | 318.06 | 2.30  | [M+Cl]- | hydroxy-deoxyguanosine    | C <sub>10</sub> H <sub>13</sub> N <sub>5</sub> O <sub>5</sub> |
| Small molecules | -                                               | 333.07 | 333.08 | 1.34  | [M+Cl]- | Phenylethanol glucuronide | C <sub>14</sub> H <sub>18</sub> O <sub>7</sub>                |
| Small molecules | -                                               | 340.12 | 340.13 | 2.30  | [M-H]-  | glucosaminylmyo-inositol  | C <sub>12</sub> H <sub>23</sub> NO <sub>10</sub>              |
| Small molecules | -                                               | 369.04 | 369.04 | 1.36  | [M+Cl]- | Glycerylphosphoinositol   | C <sub>9</sub> H <sub>19</sub> O <sub>11</sub> P              |
| Small molecules | -                                               | 452.41 | 452.41 | 1.29  | [M-H]-  | Hexacosanoylglycine       | C <sub>28</sub> H <sub>55</sub> NO <sub>3</sub>               |

Note: The compounds were detected by LC-MS and summarized, matching with databases: Lipidmaps and Lipidblast. The lipid categories, including main classes and subclasses, were listed according to the rules of the LIPID MAPS Lipid Classification System.
